# Supplementary material for: Effect of High-Dose vs Standard-Dose Vitamin D Supplementation on Neurodevelopment of Healthy Term Infants: A Randomized Clinical Trial
Source: PubMed Central journal article supplement (PMC8427371; doi:10.1001/jamanetworkopen.2021.24493), 2021-09-08
Supplement: jamanetwopen-e2124493-s001.pdf [file jamanetwopen-e2124493-s001.pdf]

1 Supplementary Online Content 1

2  
3  
4  
5  
6  
7  
8  
9  
10

**Vitamin D Intervention in Infants (VIDI) trial**

**PROTOCOL AND STATISTICAL ANALYSIS PLAN**

**11 PROTOCOL**

12

13 Vitamin D Intervention in Infants (VIDI) is a large randomized trial that aims to evaluate effects of  
14 two vitamin D supplemental doses in early childhood on bone strength, infections, immunity,  
15 allergy, atopy and asthma, neurologic and cognitive development, and genetic regulation of mineral  
16 homeostasis.

17

18 This protocol comprises the applied methods to evaluate the effects of vitamin D supplementation  
19 on the primary outcomes of the study: developmental milestones and social-emotional problems and  
20 competencies in the first two years of life. Methods for additional outcomes have been described in  
21 Helve et al, 2017.<sup>1</sup>

22

**23 Background**

24

25 Both cutaneously synthesized and vitamin D obtained from diet and supplements contribute to  
26 circulating 25-hydroxyvitamin D concentrations. The optimal 25-hydroxyvitamin D concentration  
27 is still under discussion. In 2011, Institute of Medicine guidelines stated that 25-hydroxyvitamin D  
28 concentrations above 50 nmol/L are required for normal body functions, including linear growth  
29 and bone mass accrual.<sup>2</sup> According to the Endocrine Society, concentrations above 75 nmol/L may  
30 be necessary to achieve optimal long-term health benefits.<sup>3</sup>

31

32 In Finland, Vitamin D supplementation has been recommended to all infants since the 1940's, but  
33 in line with the declining prevalence of rickets in our country, the recommended doses have  
34 gradually decreased. The present Finnish Nutritional Council guidelines recommend 10 µg (400 IU)  
35 of vitamin D3 supplementation daily for all infants from the age of 2 weeks to 2 years. Despite  
36 these recommendations, 20 % of 14-month-old children are shown to be vitamin D deficient (< 50  
37 nmol/L).<sup>4</sup>

38 Normal bone development and growth requires adequate intake of minerals, such as calcium and  
39 phosphate. Parathyroid hormone and biologically active form of vitamin D, 1,25-dihydroxyvitamin  
40 D, regulate calcium and phosphate concentrations. In addition, 1,25-dihydroxyvitamin D has direct  
41 effect on bone cells. Insufficient vitamin D supply results in inadequate bone mineralisation at  
42 growth plates and leads to rickets.<sup>5</sup> In addition to its skeletal effects, vitamin D is a steroid hormone  
43 with diverse physiological roles in neurological, immune and inflammatory disorders.<sup>6,7</sup> Vitamin D  
44 is neuroprotective<sup>6,8</sup> and takes part in regulating the development, differentiation and axonal  
45 ramification of nerve cells through neurotrophic factors, and in gene regulation. Nuclear receptors  
46 of vitamin D and the presence of specific enzymes that regulate its intracellular conversion to active  
47 form have been identified in different parts of the brain.<sup>9</sup> Vitamin D may be important for brain  
48 development especially in the early years of life when the brain is developing rapidly and is  
49 sensitive to nutrient deficiencies.<sup>10</sup>

50 Lower vitamin D concentrations are associated with neurodevelopmental disorders, including  
51 autism spectrum disorder (ASD) and attention-deficient hyperactivity disorder (ADHD) in  
52 children.<sup>11,12</sup> Associations between vitamin D concentrations and cognitive and motor functioning  
53 has not been systematically found.<sup>13</sup> However, previous evidence is based on observational studies  
54 and no causal relationship can be inferred. Randomized controlled trials (RCT),<sup>14-17</sup> as well as non-  
55 randomized trials,<sup>18-22</sup> on vitamin D supplementation in children have been small-scale studies,  
56 focused typically on symptom severity among children with ASD or ADHD, and reported mixed  
57 findings. Further studies are needed to test whether vitamin D supplementation from infancy on in  
58 healthy community-based children provides benefits on neurodevelopment.

**59 Primary outcomes**

60

61 Primary outcomes of the study are developmental milestones measured with the Ages and Stages  
62 Questionnaire (ASQ) at age 12 and 24 months and social-emotional problems and competencies  
63 measured with Infant-Toddler Social Emotional Assessment (ITSEA) at age 24 months.

64

**65 Participants and methods**

66

67 A total of 1 000 families are recruited and informed consent is obtained 1-2 days after the delivery  
68 at the Kätilöopisto Maternity Hospital in Helsinki. We include white northern European women  
69 with a singleton pregnancy and without regular medication. Healthy infants born at term (37-42  
70 weeks) and with weight appropriate for gestational age are included in the study. Exclusion criteria  
71 for the infants are: seizures, need for early antibiotic treatment, need for nasal continuous positive  
72 airway pressure > 24 hours, extended phototherapy > 72 hours, need for nasogastric tube > 24 hours  
73 or intravenous glucose infusion. Data on family background (parents' socio-economic status, health,  
74 lifestyle factors) and maternal dietary status are documented with a questionnaire. At birth, a cord  
75 blood sample (20 ml) is taken and stored for later analyses.

76

77 Participating infants are randomised to receive either the currently recommended vitamin D3  
78 supplementation of 10 µg (400 IU) daily or a higher dose of 30 µg (1200 IU) daily from age 2  
79 weeks to 2 years. Boys and girls are randomised separately in blocks of 50. Randomisation is  
80 performed by the Helsinki University Hospital Pharmacy. The study is double-blinded. Vitamin D  
81 is administered orally as vitamin D3, with a dose of 5 drops a day for both concentrations. The  
82 families record daily vitamin D supplementation.

83

**84 Follow-up**

85

86 Participants are assessed at a study outpatient clinic by a study nurse and/or pediatrician at 12  
87 months and 24 months of age. Data on developmental milestones are collected with Ages and  
88 Stages Questionnaire (ASQ)<sup>23,24</sup> at 12- and 24-month and data on social-emotional problems and  
89 competencies with Infant-Toddler Social Emotional Assessment (ITSEA)<sup>25</sup> at 24-month follow-ups.  
90 Blood samples are taken for biochemistry. Families are provided study diaries where they keep  
91 daily records on dosing of vitamin D3 supplement.

92

**93 Specific methods**

94

**95 Biochemical markers**

96

97 Serum 25-hydroxyvitamin D concentration is measured from serum samples with an automated  
98 IDSiSYS analyser (IDS Ltd., Bolton, UK) which employs a chemiluminescence immunoassay  
99 (CLIA) with high sensitivity, a fast protocol, with a 10-µl specimen volume. The method is  
100 validated against LC-MS in-house as well as by the manufacturer. Analyses are performed at the  
101 Pediatric Research Centre laboratory in Biomedicum, University of Helsinki (Helsinki, Finland).  
102 Reproducibility is ensured by adhering to the Vitamin D External Quality Assessment Scheme  
103 (DEQAS, Charing Cross Hospital, London UK). The IDS-iSYS immunoassay will also be used to  
104 analyse serum intact parathyroid hormone concentration from serum samples.

105

106 Ionised calcium (adjusted to pH 7.40, normal range 1.16-1.39 and 1.17-1.35 mmol/L for age groups  
107 1- 12 months and 24 months respectively) is analysed from serum samples at 12 and 24 months at  
108 the Central Laboratory of Helsinki University Hospital (HUSLAB) using ABL 90 FLEX or ABL

109 835 FLEX blood gas analysers. HUSLAB is an accredited laboratory adhering to international  
110 (T055) SFS-EN ISO 15189 and SFS-EN ISO/IEC 17025 standards.

111

### 112 **Developmental milestones**

113 Developmental milestones are assessed with parent-reported Ages and Stages Questionnaire (ASQ)  
114 3<sup>rd</sup> edition. ASQ is a reliable and valid tool with high sensitivity and specificity for screening  
115 children requiring further developmental assessment.<sup>23,24</sup> It comprises 21 age-specific  
116 questionnaires, covering 1 through 66 months of age, each with six items in each of five  
117 developmental domains: communication, gross motor, fine motor, problem solving, and  
118 personal/social (solitary social play and play with toys and other children) skills.<sup>23</sup> Subscale scores  
119 range from 0 to 60. We chose the 12-month (11-13 months) and 24-month (23-25.5 months)  
120 questionnaires.

### 121 **Social-emotional problems and competencies**

122 Social-emotional problems and competencies are assessed with parent-reported Infant-Toddler  
123 Social Emotional Assessment (ITSEA). It is an adult-report questionnaire for 12-to 36-month  
124 olds.<sup>25</sup> It includes 169 items containing a statement about the child's behavior during the last month.  
125 The scale has good psychometric properties.<sup>25</sup>

### 126 **Ethical issues and research permits**

127

128 A recent intervention study confirmed the safety of vitamin D supplementation in infants with a  
129 daily dose of 50 µg (2000 IU) daily.<sup>26</sup> Furthermore, we conducted a pilot study in 113 healthy  
130 newborns in order to evaluate short-term effects and safety of 3 different vitamin D3 doses (10 µg,  
131 30 µg, 40 µg daily).<sup>27</sup> No adverse events occurred and all doses were deemed safe. Based on the  
132 results, we chose daily doses of 10 µg and 30 µg for the intervention study.

133

134 An external clinical research institute monitors the study and possible adverse effects. As a safety  
135 protocol, the infants are monitored for hypercalcemia at follow-up visits. If the calcium  
136 concentration exceeds the upper reference limit of ionised calcium by  $\geq 10\%$ , defined as ionised  
137 calcium concentration above 1.53 mmol/L at 6 and 12 months and 1.48 mmol/L at 2 years follow-  
138 up, the ionised calcium and 25-hydroxyvitamin D concentrations will be repeatedly measured,  
139 symptoms indicative of hypercalcemia will be evaluated, and, if necessary, dosing of vitamin D  
140 supplementation adjusted.

141

142 Blood samples are taken as follows: A) 20 ml from the umbilical vein after cord clamping at birth,  
143 B) 15 ml at age 1 year, and C)  $\leq 20$  ml at age 2 years. These volumes are clearly below the allowed  
144 maximal volumes for research sampling (approximate limits for research purposes are for ages 1  
145 year: 24 ml and 2 years: 36 ml; i.e. 3% of circulating blood volume).

146

147 The radiation exposure from pQCT measurements is estimated to be 30 µSv, and exposure from  
148 whole-body DXA 50 µSv. This total dose of approximately 80 µSv equals radiation exposure  
149 during an overseas flight or 2 weeks' background radiation, and can thus be regarded as  
150 insignificant.<sup>28</sup> Similar methods have previously been used to study bone variables in newborns.<sup>27</sup>

151 The vitamin D3 supplements are provided by Orion Pharmaceuticals free of charge. The study is  
152 researcher initiated and independent.

153

154 Informed consent is obtained from the parents at recruitment. An ethical approval has been obtained  
 155 from the Research Ethics Committee of the Hospital District of Helsinki and Uusimaa (ID  
 156 107/13/03/03/2012) including permission to keep a research register of collected data where the  
 157 anonymity of all participants is secured with an identification number. Research permits from  
 158 Children's Hospital are valid until 2018. The project protocol is registered into ClinicalTrials.com  
 159 (NCT01723852).

160

## 161 STATISTICAL ANALYSIS PLAN

162

### 163 Sample size calculation and statistical analyses

164

165 We aim at detecting a 0.2 SD unit difference between continuous variables (developmental  
 166 milestones and social-behavioral problems and competencies) and Odds Ratios >2.0 in categorical  
 167 variables (mild developmental delay, clinically possible significant problems).<sup>29</sup> In order to reach  
 168 statistical power of 80% with significance level of 0.05, a total of 199 and 572 participants,  
 169 respectively, are necessary. The trial was designed with a planned sample of 1000 study  
 170 participants. We estimate a possible drop-out rate of 20% for each follow-up.

171

### 172 Statistical methods

173 Standard statistical methods such as linear, logistic and Tobit and moderation analytic strategies  
 174 with R/SPSS/MPlus will be used to study the impact of vitamin D supplementation and/or  
 175 25(OH)D concentrations, and relevant covariates, on main outcomes.

176 If needed, logarithmic transformation for nonnormal variables is performed in order to achieve  
 177 normal distribution. Main outcome measures are analysed according to intention-to-treat and  
 178 protocol-based manner.

179 To account for multiple testing and control for the false detection rate (FDR), *p*-values from the  
 180 analysis within primary/secondary analysis were used to derive an FDR-adjusted *p*-values with a  
 181 FDR-procedure setting the false discovery rate at 0.05.<sup>30</sup>

## 182 References

183

184

- 185 1. Helve O, Viljakainen H, Holmlund-Suila E, et al. Towards evidence-based vitamin D  
 186 supplementation in infants: Vitamin D intervention in infants (VIDI) - study design and  
 187 methods of a randomised controlled double-blinded intervention study. *BMC Pediatr.*  
 188 2017;17. doi:10.1186/s12887-017-0845-5
- 189 2. Ross AC. The 2011 report on dietary reference intakes for calcium and vitamin D. *Public*  
 190 *Health Nutr.* 2011;14:938-939. doi:10.1017/S1368980011000565
- 191 3. Holick MF, Binkley NC, Bischoff-Ferrari HA, et al. Guidelines for preventing and treating  
 192 vitamin D deficiency and insufficiency revisited. *J Clin Endocrinol Metab.* 2012;97:1153-  
 193 1158. doi:10.1210/jc.2011-2601
- 194 4. Viljakainen HT, Korhonen T, Hytinantti T, et al. Maternal vitamin D status affects bone  
 195 growth in early childhood-a prospective cohort study. *Osteoporos Int.* 2011;22:883-891.  
 196 doi:10.1007/s00198-010-1499-4
- 197 5. Elder CJ, Bishop NJ. Rickets. *Lancet.* 2014;383:1665-1676. doi:10.1016/S0140-  
 198 6736(13)61650-5
- 199 6. Eyles DW, Feron F, Cui X, et al. Developmental vitamin D deficiency causes abnormal brain

- 200 development. *Psychoneuroendocrinology*. 2009;34:S247-S257.  
 201 doi:10.1016/j.psyneuen.2009.04.015
- 202 7. Eyles DW, Burne THJ, McGrath JJ. Vitamin D, effects on brain development, adult brain  
 203 function and the links between low levels of vitamin D and neuropsychiatric disease. *Front*  
 204 *Neuroendocrinol*. 2013;34:47-64. doi:10.1016/j.yfrne.2012.07.001
- 205 8. Wrzosek M, Lukaszkiwicz J, Wrzosek M, et al. Vitamin D and the central nervous system.  
 206 *Pharmacol Reports*. 2013;65:271-278. doi:10.1016/S1734-1140(13)71003-X
- 207 9. Eyles DW, Smith S, Kinobe R, Hewison M, McGrath JJ. Distribution of the Vitamin D  
 208 receptor and 1 $\alpha$ -hydroxylase in human brain. *J Chem Neuroanat*. 2005;29:21-30.
- 209 10. Schwarzenberg SJ, Georgieff MK, Committee on Nutrition. Advocacy for improving  
 210 nutrition in the first 1000 days to support childhood development and adult health.  
 211 *Pediatrics*. 2018;141:pii: e20173716. doi:10.1542/peds.2017-3716
- 212 11. Föcker M, Antel J, Ring S, et al. Vitamin D and mental health in children and adolescents.  
 213 *Eur Child Adolesc Psychiatry*. 2017;26:1043-1066. doi:10.1007/s00787-017-0949-3
- 214 12. Khoshbakht Y, Bidaki R, Salehi-Abargouei A. Vitamin D status and attention deficit  
 215 hyperactivity disorder: A systematic review and meta-analysis of observational studies. *Adv*  
 216 *Nutr*. 2018;9:9-20. doi:10.1093/advances/nmx002
- 217 13. Mutua AM, Mogire RM, Elliott AM, et al. Effects of vitamin D deficiency on  
 218 neurobehavioural outcomes in children: A systematic review. *Wellcome Open Res*.  
 219 2020;5:28. doi:10.12688/wellcomeopenres.15730.1
- 220 14. Mohammadpour N, Jazayeri S, Tehrani-Doost M, et al. Effect of vitamin D supplementation  
 221 as adjunctive therapy to methylphenidate on ADHD symptoms: A randomized, double blind,  
 222 placebo-controlled trial. *Nutr Neurosci*. 2018. doi:10.1080/1028415X.2016.1262097
- 223 15. Saad K, Abdel-Rahman AA, Elserogy YM, et al. Randomized controlled trial of vitamin D  
 224 supplementation in children with autism spectrum disorder. *J Child Psychol Psychiatry*  
 225 *Allied Discip*. 2018. doi:10.1111/jcpp.12652
- 226 16. Kerley CP, Power C, Gallagher L, Coghlan D. Lack of effect of Vitamin D 3  
 227 supplementation in autism: A 20-week, placebo-controlled RCT. *Arch Dis Child*. 2017.  
 228 doi:10.1136/archdischild-2017-312783
- 229 17. Azzam HME, Sayyah H, Youssef S, et al. Autism and vitamin D: An intervention study.  
 230 *Middle East Curr Psychiatry*. 2015. doi:10.1097/01.XME.0000457269.05570.78
- 231 18. Elshorbagy HH, Barseem NF, Abdelghani WE, et al. Impact of Vitamin D Supplementation  
 232 on Attention-Deficit Hyperactivity Disorder in Children. *Ann Pharmacother*. 2018.  
 233 doi:10.1177/1060028018759471
- 234 19. Saad K, Abdel-rahman AA, Elserogy YM, et al. Vitamin D status in autism spectrum  
 235 disorders and the efficacy of vitamin D supplementation in autistic children. *Nutr Neurosci*.  
 236 2016. doi:10.1179/1476830515Y.0000000019
- 237 20. Feng J, Shan L, Du L, et al. Clinical improvement following vitamin D3 supplementation in  
 238 Autism Spectrum Disorder. *Nutr Neurosci*. 2017. doi:10.1080/1028415X.2015.1123847
- 239 21. Ucuş II, Dursun OB, Esin IS, et al. The relationship between Vitamin D, autistic spectrum  
 240 disorders, and cognitive development: Do glial cell line-derived neurotrophic factor and  
 241 nerve growth factor play a role in this relationship? *Int J Dev Disabil*. 2015;6:222-230.  
 242 doi:10.1179/2047387714Y.0000000054
- 243 22. Jia F, Wang B, Shan L, Xu Z, Staal WG, Du L. Core symptoms of autism improved after  
 244 vitamin D supplementation. *Pediatrics*. 2015;135:e196-e198. doi:10.1542/peds.2014-2121
- 245 23. Squires J, Bricker D. *Ages and Stages Questionnaire (ASQ): A Parent Completed Child*  
 246 *Monitoring System (3rd Ed.)*. Baltimore: MD: Brooks Publishing Company; 2009.
- 247 24. Squires J, Bricker D, Potter L. Revision of a parent-completed developmental screening tool:  
 248 Ages and stages questionnaires. *J Pediatr Psychol*. 1997;22(3):313-328.  
 249 doi:10.1093/jpepsy/22.3.313

SUPPLEMENTARY DATA Tuovinen et al.

- 250 25. Briggs-Gowan M, Carter AS. Preliminary acceptability and psychometrics of the Infant–  
251 Toddler Social and Emotional Assessment (ITSEA): A new adult-report questionnaire. *Infant*  
252 *Ment Health J.* 1998;19:422-445.
- 253 26. Wicklow BA, Taback SP. Feasibility of a type 1 diabetes primary prevention trial using 2000  
254 IU vitamin D3 in infants from the general population with increased HLA-associated risk.  
255 *Ann N Y Acad Sci.* 2006;1079:310-312. doi:10.1196/annals.1375.047
- 256 27. Holmlund-Suila E, Viljakainen H, Hytinantti T, Lamberg-Allardt C, Andersson S, Mäkitie O.  
257 High-dose vitamin D intervention in infants - Effects on vitamin D status, calcium  
258 homeostasis, and bone strength. *J Clin Endocrinol Metab.* 2012;97:4139-4147.  
259 doi:10.1210/jc.2012-1575
- 260 28. Blake GM, Naeem M, Boutros M. Comparison of effective dose to children and adults from  
261 dual X-ray absorptiometry examinations. *Bone.* 2006;38:935-942.  
262 doi:10.1016/j.bone.2005.11.007
- 263 29. Chen H, Cohen P, Chen S. How big is a big odds ratio? Interpreting the magnitudes of odds  
264 ratios in epidemiological studies. *Commun Stat Simul Comput.* 2010;39:860-864.  
265 doi:10.1080/03610911003650383
- 266 30. Benjamini Y, Hochberg Y. Controlling the false discovery rate: a practical and powerful  
267 approach to multiple testing. *J R Stat Soc.* 1995;57:289-300.  
268  
269  
270  
271  
272  
273  
274
