# Supplementary material for: Effect of High-Dose vs Standard-Dose Vitamin D Supplementation on Neurodevelopment of Healthy Term Infants: A Randomized Clinical Trial
Source: PubMed Central journal article supplement (PMC8427371; doi:10.1001/jamanetworkopen.2021.24493), 2021-09-08
Supplement: jamanetwopen-e2124493-s003.pdf [file jamanetwopen-e2124493-s003.pdf]

## Data Sharing Statement

Tuovinen. Effect of High-Dose vs Standard-Dose Vitamin D Supplementation on Neurodevelopment of Healthy Term Infants. *JAMA Netw Open*. Published September 08, 2021.  
doi:10.1001/jamanetworkopen.2021.24493

### Data

**Data available:** No
